# Supplementary material
Source: Springer Nature journal article supplement (http://www.springermedizin.de/resource/supplementary/12876_2010_535_MOESM2_ESM.pdf/9436936)
Supplement: MOESM2 [file 9436936]

Publications identified and screened  
(n=191)

Studies Excluded (n=107)  
76 not relevant to HLA or HCC  
28 relevant to treatment  
3 not human studies

Potentially relevant citations  
identified for evaluation (n=84)

Studies Excluded (n=72)  
24 not case-control study  
22 only serologic results  
19 not relevant to HLA-DRB1  
7 not relevant to HCC

Full manuscripts retrieved for  
evaluation (n=12)

Studies Excluded (n=4)  
3 lack of sufficient data  
1 contain duplicate information or overlaps

Studies included in meta-analysis  
(n=8)
